# Supplementary figures and images for: CX43 inhibit ferroptosis in villous and decidua tissues of patients with unexplained recurrent spontaneousabortion through the Nrf2/GPX4 signaling pathway
Source: Research Square preprint supplement (doi:10.21203/rs.3.rs-8325034/v1), 2025-12-31

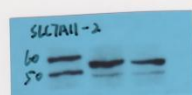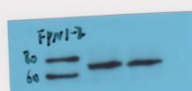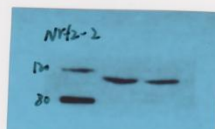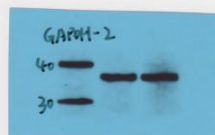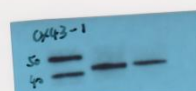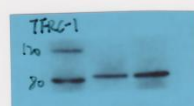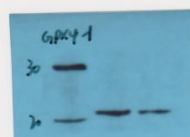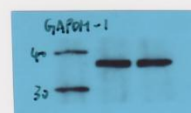

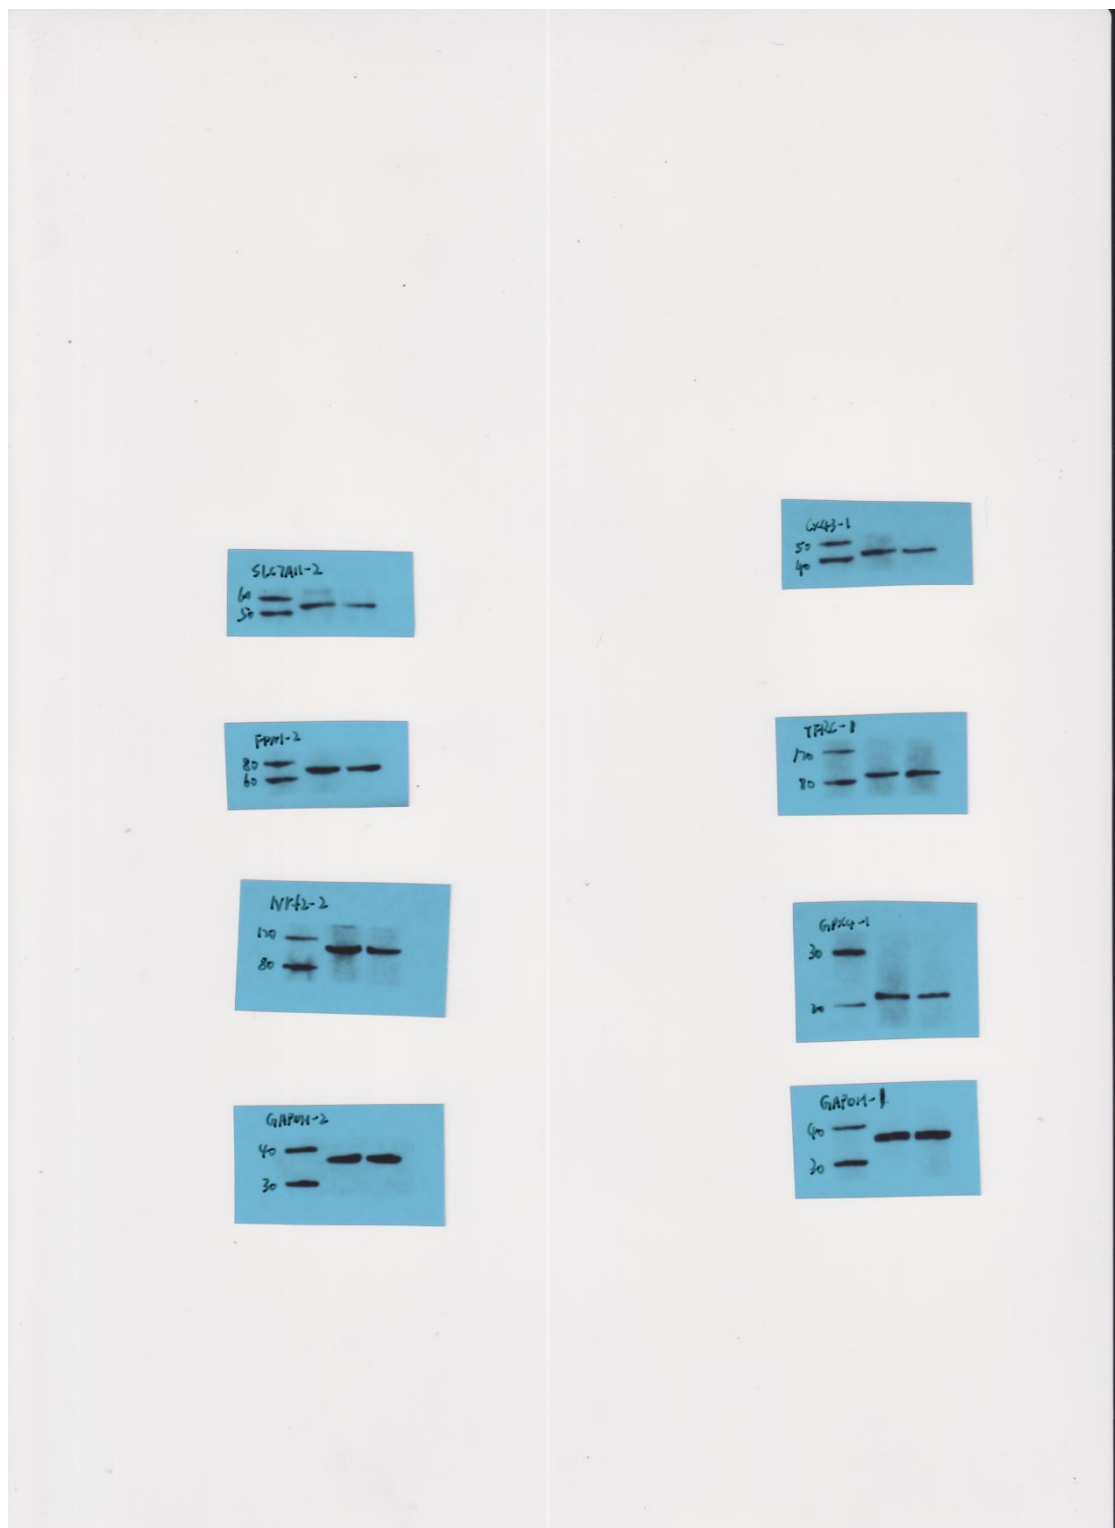

Figure 2

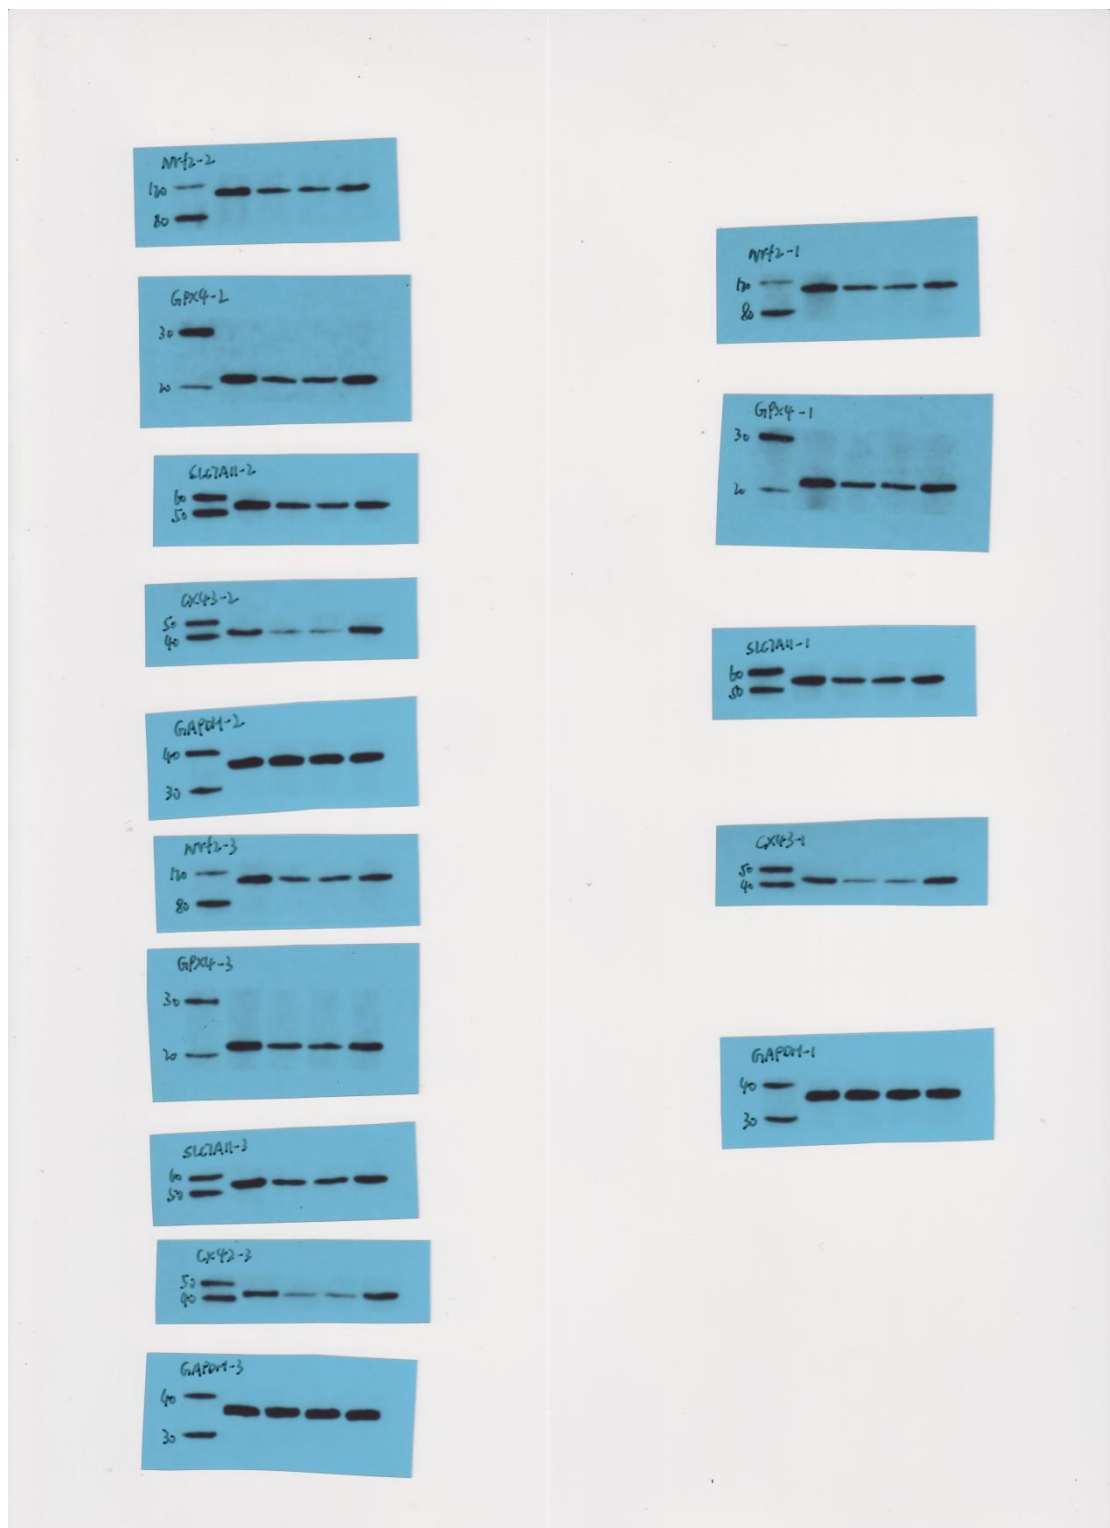

Figure 3

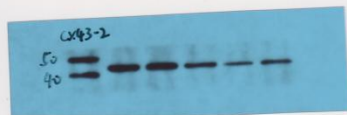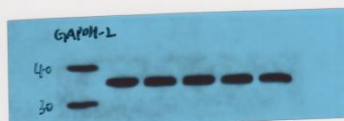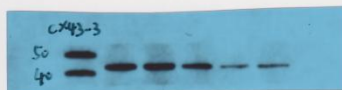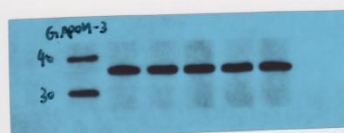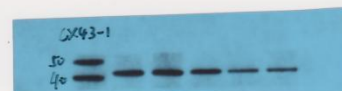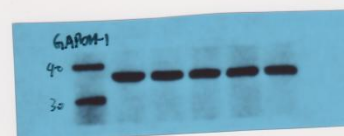

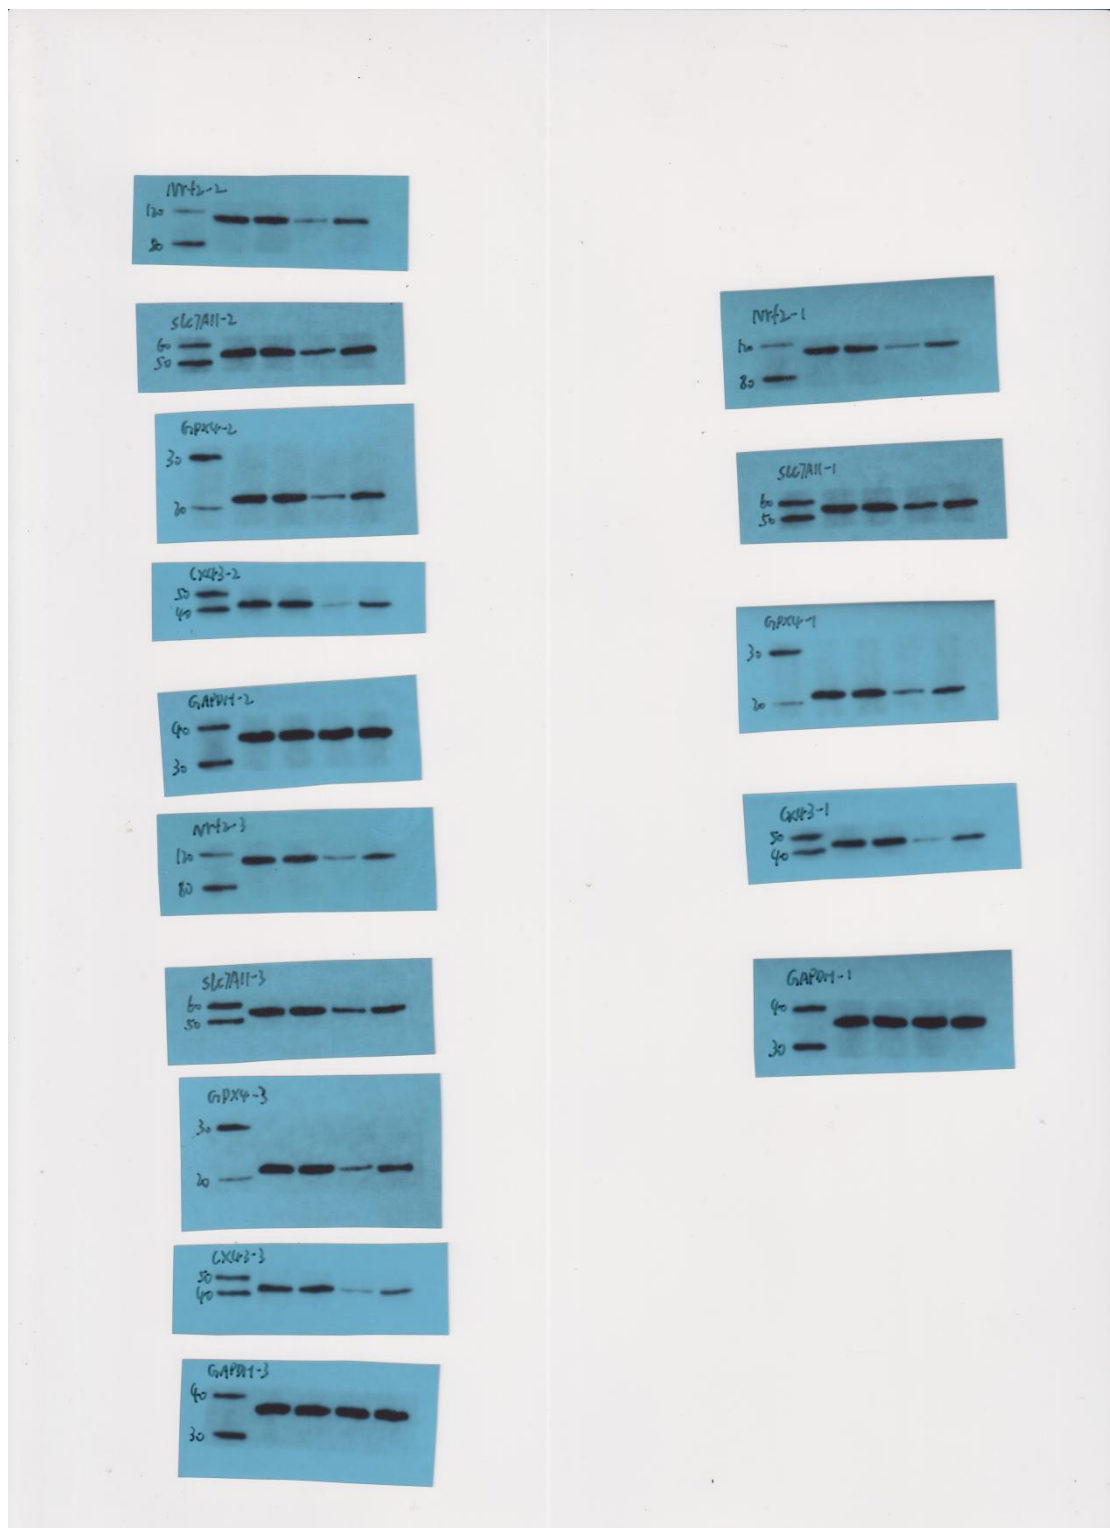

Figure 4

Supplement: Supplementary file 1 [file 2f248ebbdd4c14a8be38753a.pdf]
